# Supplementary material for: (Bu3Sn)2–TBAF: a new combination reagent for the reduction and deuteration of aryl bromides and iodides
Source: Royal Society of Chemistry journal article supplement (doi:10.1039/b406103a), 2004-01-01
Supplement: b406103a.pdf [file b406103a.pdf]

# (Bu<sub>3</sub>Sn)<sub>2</sub>-TBAF: A New Combination Reagent for the Reduction and Deuteration of Aryl Bromides and Iodides.

Electronic Supplementary Information

David C. Harrowven, Ian L. Guy and Michael I. T. Nunn

Department of Chemistry, University of Southampton, Southampton, SO17 1BJ, England

## REPRESENTATIVE PROCEDURES

### Reduction using (Bu<sub>3</sub>Sn)<sub>2</sub>-TBAF

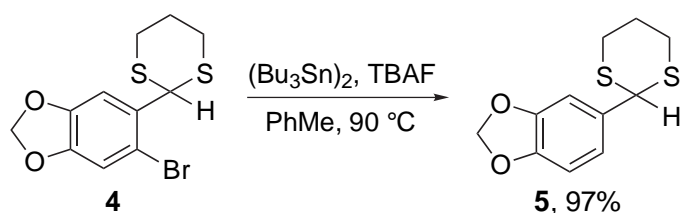

5-Bromo-6-[1,3]dithian-2-ylbenzo[1,3]dioxole (**4**)<sup>1</sup> (80 mg, 0.25 mmol), hexabutylditin (189  $\mu$ L, 0.375 mmol) and TBAF (1M soln. in THF:H<sub>2</sub>O (95:5), 1.0 mL, 1.00 mmol) were heated in toluene (5 mL) at 90 °C for 1 h. The resulting solution was cooled to room temperature, solvents were removed *in vacuo* and the crude product was purified by flash column chromatography (10% KF/SiO<sub>2</sub>, DCM) to yield 5-[1,3]dithian-2-ylbenzo[1,3]dioxole (**5**) as a white crystalline solid (58 mg, 0.24 mmol, 97%); m.p. 88 - 90°C (EtOH / water) lit.<sup>2</sup> 87 - 88°C (AcOH);  $\nu_{\text{max}}$  (film) 2895 w, 1501 s, 1488 s, 1441 m, 1249 s, 1037 s cm<sup>-1</sup>;  $\delta_{\text{H}}$  (300 MHz, CDCl<sub>3</sub>) 6.99 (1H, d, *J* 1.8 Hz, CH), 6.94 (1H, dd, *J* 8.1, 1.8 Hz, CH), 6.76 (1H, d, *J* 8.1 Hz, CH), 5.96 (2H, s, OCH<sub>2</sub>O), 5.10 (1H, s, SCHS), 3.05 (2H, ddd, *J* 14.3, 12.1, 2.4 Hz, 2 x SCHH), 2.91 (2H, ddd, *J* 14.3, 4.4, 3.2 Hz, 2 x SCHH), 2.17 (1H, dtt, *J* 14.1, 4.4, 2.4 Hz, SCH<sub>2</sub>CHHCH<sub>2</sub>S), 1.90 (1H, dtt, *J* 14.1, 12.1, 3.2 Hz, SCH<sub>2</sub>CHHCH<sub>2</sub>S);  $\delta_{\text{C}}$  (75 MHz, CDCl<sub>3</sub>) 147.9 (C), 147.8 (C), 133.1 (C), 121.4 (CH), 108.5 (2 x CH), 101.4 (OCH<sub>2</sub>O), 51.3 (SCHS), 32.3 (2 x SCH<sub>2</sub>), 25.2 (CH<sub>2</sub>); *m/z* (EI) 240 (M<sup>+</sup>, 52), 166 (100).

## Reduction using Bu<sub>3</sub>SnH-TBAF

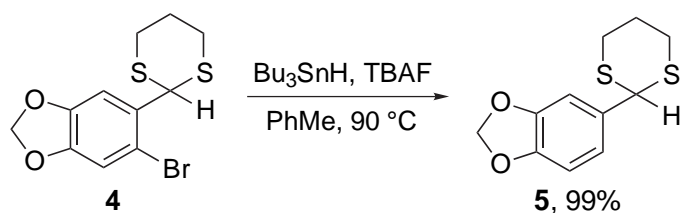

5-Bromo-6-[1,3]dithian-2-ylbenzo[1,3]dioxole (**4**) (80 mg, 0.25 mmol), tributyltin hydride (134  $\mu\text{L}$ , 0.50 mmol) and TBAF (1M soln. in THF:H<sub>2</sub>O (95:5), 1.0 mL, 1.00 mmol) were heated in toluene (5 mL) at 90  $^\circ\text{C}$  for 1 h. The resulting solution was cooled to room temperature, solvents were removed *in vacuo* and the crude product was purified by flash column chromatography (10% KF/SiO<sub>2</sub>, DCM) to yield 5-[1,3]dithian-2-ylbenzo[1,3]dioxole (**5**) as a white crystalline solid (59 mg, 0.25 mmol, 99%). Data as stated above.

## Deuteration using (Bu<sub>3</sub>Sn)<sub>2</sub>-TBAF, D<sub>2</sub>O

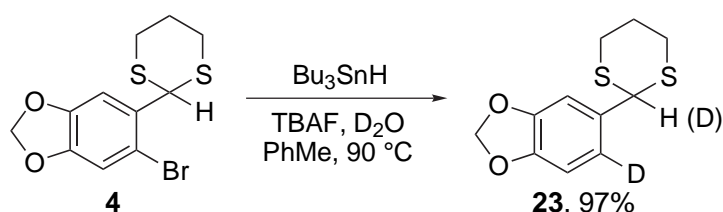

5-Bromo-6-[1,3]dithian-2-ylbenzo[1,3]dioxole (**4**) (80 mg, 0.25 mmol), hexabutylditin (189  $\mu\text{L}$ , 0.375 mmol) and TBAF (1M soln. in THF:D<sub>2</sub>O (95:5), 1.0 mL, 1.00 mmol) were heated in toluene (5 mL) at 90  $^\circ\text{C}$  for 1 h. The resulting solution was cooled to room temperature, solvents were removed *in vacuo* and the crude product was purified by flash column chromatography (10% KF/SiO<sub>2</sub>, DCM) to yield the title compound (**23**) as a white crystalline solid (58 mg, 0.24 mmol, 97%); m.p. 81 - 84 $^\circ\text{C}$  (ether/petrol);  $\nu_{\text{max}}$  (film) 2892 w, 1477 s, 1420 w, 1274 w, 1240 m, 1039 m  $\text{cm}^{-1}$ ;  $\delta_{\text{H}}$  (300 MHz, CDCl<sub>3</sub>) 6.99 (1H, s, CH), 6.76 (1H, s, CH), 5.96 (2H, s, OCH<sub>2</sub>O), 5.10 (~0.5H, s, SCHS), 3.05 (2H, ddd, *J* 14.3, 12.1, 2.4 Hz, 2 x SCHH), 2.91 (2H, ddd, *J* 14.3, 4.4, 3.2 Hz, 2 x SCHH), 2.17 (1H, dtt, *J* 14.1, 4.4, 2.4 Hz, SCH<sub>2</sub>CHHCH<sub>2</sub>S), 1.91 (1H, dtt, *J* 14.1, 12.1, 3.2 Hz, SCH<sub>2</sub>CHHCH<sub>2</sub>S);  $\delta_{\text{C}}$  (75 MHz, CDCl<sub>3</sub>) 147.9 (C), 147.8 (C), 132.9 (C), 121.4 (CD), 108.5 (CH), 108.4 (CH), 101.4 (OCH<sub>2</sub>O), 51.3 (SCHS), 32.3 (2 x SCH<sub>2</sub>), 25.2 (CH<sub>2</sub>);  $m/z$  (EI): 241 ( $\text{M}^+$ , 100).

## Footnote

Reactions have been realised in THF, DMF and 1,4-dioxane. They may be conducted at lower temperature but take appreciably longer. At RT, for example, reactions near completion after *ca.* 2 days.

## References

- 1 D. C. Harrowven, *Tetrahedron*, 1993, **49**, 9039.
- 2 M. D. Rozwadowska and M. Chrzanowska, *Tetrahedron*, 1985, **41**, 2885.
